# Supplementary material for: Cross-frequency synchronization connects networks of fast and slow oscillations during visual working memory maintenance
Source: eLife. 2016 Sep 26;5:e13451. doi: 10.7554/eLife.13451 (PMC5070951; doi:10.7554/eLife.13451)
Supplement: Figure 2—source data 1. — List of the Destrieux-atlas parcels used in this study (see Destrieux et al., 2010 and the Freesurfer software: https://surfer.nmr.mgh.harvard.edu/). DOI: http://dx.doi.org/10.7554/eLife.13451.004 [file elife-13451-fig2-data1.xlsx]

## Sheet: Parcel list
Index	Abbr.	Short name	Full Name	Hemisphere
1	mrgF_L	G_and_S_frontomargin__Left	Fronto-marginal gyrus (of Wernicke) and sulcus	Left
2	mrgF_R	G_and_S_frontomargin__Right	Fronto-marginal gyrus (of Wernicke) and sulcus	Right
3	iO_L	G_and_S_occipital_inf__Left	Inferior occipital gyrus (O3) and sulcus	Left
4	iO_R	G_and_S_occipital_inf__Right	Inferior occipital gyrus (O3) and sulcus	Right
5	paC_L	G_and_S_paracentral__Left	Paracentral lobule and sulcus	Left
6	paC_R	G_and_S_paracentral__Right	Paracentral lobule and sulcus	Right
7	subC_L	G_and_S_subcentral__Left	Subcentral gyrus (central operculum) and sulci	Left
8	subC_R	G_and_S_subcentral__Right	Subcentral gyrus (central operculum) and sulci	Right
9	trF_L	G_and_S_transv_frontopol__Left	Transverse frontopolar gyri and sulci	Left
10	trF_R	G_and_S_transv_frontopol__Right	Transverse frontopolar gyri and sulci	Right
11	CIa_L	G_and_S_cingul-Ant__Left	Anterior part of the cingulate gyrus and sulcus (ACC)	Left
12	CIa_R	G_and_S_cingul-Ant__Right	Anterior part of the cingulate gyrus and sulcus (ACC)	Right
13	aCIm_L	G_and_S_cingul-Mid-Ant__Left	Middle-anterior part of the cingulate gyrus and sulcus (aMCC)	Left
14	aCIm_R	G_and_S_cingul-Mid-Ant__Right	Middle-anterior part of the cingulate gyrus and sulcus (aMCC)	Right
15	pCIm_L	G_and_S_cingul-Mid-Post__Left	Middle-posterior part of the cingulate gyrus and sulcus (pMCC)	Left
16	pCIm_R	G_and_S_cingul-Mid-Post__Right	Middle-posterior part of the cingulate gyrus and sulcus (pMCC)	Right
17	dCIp_L	G_cingul-Post-dorsal__Left	Posterior-dorsal part of the cingulate gyrus (dPCC)	Left
18	dCIp_R	G_cingul-Post-dorsal__Right	Posterior-dorsal part of the cingulate gyrus (dPCC)	Right
19	vCIp_L	G_cingul-Post-ventral__Left	Posterior-ventral part of the cingulate gyrus (vPCC, isthmus of the cingulate gyrus)	Left
20	vCIp_R	G_cingul-Post-ventral__Right	Posterior-ventral part of the cingulate gyrus (vPCC, isthmus of the cingulate gyrus)	Right
21	CN_L	G_cuneus__Left	Cuneus (O6)	Left
22	CN_R	G_cuneus__Right	Cuneus (O6)	Right
23	iFGopc_L	G_front_inf-Opercular__Left	Opercular part of the inferior frontal gyrus	Left
24	iFGopc_R	G_front_inf-Opercular__Right	Opercular part of the inferior frontal gyrus	Right
25	iFGorb_L	G_front_inf-Orbital__Left	Orbital part of the inferior frontal gyrus	Left
26	iFGorb_R	G_front_inf-Orbital__Right	Orbital part of the inferior frontal gyrus	Right
27	iFGtri_L	G_front_inf-Triangul__Left	Triangular part of the inferior frontal gyrus	Left
28	iFGtri_R	G_front_inf-Triangul__Right	Triangular part of the inferior frontal gyrus	Right
29	mFG_L	G_front_middle__Left	Middle frontal gyrus (F2)	Left
30	mFG_R	G_front_middle__Right	Middle frontal gyrus (F2)	Right
31	sFG_L	G_front_sup__Left	Superior frontal gyrus (F1)	Left
32	sFG_R	G_front_sup__Right	Superior frontal gyrus (F1)	Right
33	lgING_L	G_Ins_lg_and_S_cent_ins__Left	Long insular gyrus and central sulcus of the insula	Left
34	lgING_R	G_Ins_lg_and_S_cent_ins__Right	Long insular gyrus and central sulcus of the insula	Right
35	shING_L	G_insular_short__Left	Short insular gyri	Left
36	shING_R	G_insular_short__Right	Short insular gyri	Right
37	mOG_L	G_occipital_middle__Left	Middle occipital gyrus (O2, lateral occipital gyrus)	Left
38	mOG_R	G_occipital_middle__Right	Middle occipital gyrus (O2, lateral occipital gyrus)	Right
39	sOG_L	G_occipital_sup__Left	Superior occipital gyrus (O1)	Left
40	sOG_R	G_occipital_sup__Right	Superior occipital gyrus (O1)	Right
41	OTGfus_L	G_oc-temp_lat-fusifor__Left	Lateral occipito-temporal gyrus (fusiform gyrus, O4-T4)	Left
42	OTGfus_R	G_oc-temp_lat-fusifor__Right	Lateral occipito-temporal gyrus (fusiform gyrus, O4-T4)	Right
43	OTGling_L	G_oc-temp_med-Lingual__Left	Lingual gyrus, ligual part of the medial occipito-temporal gyrus (O5)	Left
44	OTGling_R	G_oc-temp_med-Lingual__Right	Lingual gyrus, ligual part of the medial occipito-temporal gyrus (O5)	Right
45	OTGhip_L	G_oc-temp_med-Parahip__Left	Parahippocampal gyrus, parahippocampal part of the medial occipito-temporal gyrus	Left
46	OTGhip_R	G_oc-temp_med-Parahip__Right	Parahippocampal gyrus, parahippocampal part of the medial occipito-temporal gyrus	Right
47	orbG_L	G_orbital__Left	Orbital gyri	Left
48	orbG_R	G_orbital__Right	Orbital gyri	Right
49	iPGang_L	G_pariet_inf-Angular__Left	Angular gyrus	Left
50	iPGang_R	G_pariet_inf-Angular__Right	Angular gyrus	Right
51	iPGsup_L	G_pariet_inf-Supramar__Left	Supramarginal gyrus	Left
52	iPGsup_R	G_pariet_inf-Supramar__Right	Supramarginal gyrus	Right
53	sPG_L	G_parietal_sup__Left	Superior parietal lobule (lateral part of P1)	Left
54	sPG_R	G_parietal_sup__Right	Superior parietal lobule (lateral part of P1)	Right
55	poCG_L	G_postcentral__Left	Postcentral gyrus	Left
56	poCG_R	G_postcentral__Right	Postcentral gyrus	Right
57	prCG_L	G_precentral__Left	Precentral gyrus	Left
58	prCG_R	G_precentral__Right	Precentral gyrus	Right
59	prCN_L	G_precuneus__Left	Precuneus (medial part of P1)	Left
60	prCN_R	G_precuneus__Right	Precuneus (medial part of P1)	Right
61	rcG_L	G_rectus__Left	Straight gyrus, Gyrus rectus	Left
62	rcG_R	G_rectus__Right	Straight gyrus, Gyrus rectus	Right
63	subcalG_L	G_subcallosal__Left	Subcallosal area, subcallosal gyrus	Left
64	subcalG_R	G_subcallosal__Right	Subcallosal area, subcallosal gyrus	Right
65	sTG-trTG_L	G_temp_sup-G_T_transv__Left	Anterior transverse temporal gyrus (of Heschl)	Left
66	sTG-trTG_R	G_temp_sup-G_T_transv__Right	Anterior transverse temporal gyrus (of Heschl)	Right
67	sTGla_L	G_temp_sup-Lateral__Left	Lateral aspect of the superior temporal gyrus	Left
68	sTGla_R	G_temp_sup-Lateral__Right	Lateral aspect of the superior temporal gyrus	Right
69	sTGpp_L	G_temp_sup-Plan_polar__Left	Planum polare of the superior temporal gyrus	Left
70	sTGpp_R	G_temp_sup-Plan_polar__Right	Planum polare of the superior temporal gyrus	Right
71	sTGpt_L	G_temp_sup-Plan_tempo__Left	Planum temporale or temporal plane of the superior temporal gyrus	Left
72	sTGpt_R	G_temp_sup-Plan_tempo__Right	Planum temporale or temporal plane of the superior temporal gyrus	Right
73	iTG_L	G_temporal_inf__Left	Inferior temporal gyrus (T3)	Left
74	iTG_R	G_temporal_inf__Right	Inferior temporal gyrus (T3)	Right
75	mTG_L	G_temporal_middle__Left	Middle temporal gyrus (T2)	Left
76	mTG_R	G_temporal_middle__Right	Middle temporal gyrus (T2)	Right
77	laShz_L	Lat_Fis-ant-Horizont__Left	Horizontal ramus of the anterior segment of the lateral sulcus (or fissure)	Left
78	laShz_R	Lat_Fis-ant-Horizont__Right	Horizontal ramus of the anterior segment of the lateral sulcus (or fissure)	Right
79	laSvr_L	Lat_Fis-ant-Vertical__Left	Vertical ramus of the anterior segment of the lateral sulcus (or fissure)	Left
80	laSvr_R	Lat_Fis-ant-Vertical__Right	Vertical ramus of the anterior segment of the lateral sulcus (or fissure)	Right
81	laSp_L	Lat_Fis-post__Left	Posterior ramus (or segment) of the lateral sulcus (or fissure)	Left
82	laSp_R	Lat_Fis-post__Right	Posterior ramus (or segment) of the lateral sulcus (or fissure)	Right
83	Opole_L	Pole_occipital__Left	Occipital pole	Left
84	Opole_R	Pole_occipital__Right	Occipital pole	Right
85	Tpole_L	Pole_temporal__Left	Temporal pole	Left
86	Tpole_R	Pole_temporal__Right	Temporal pole	Right
87	caS_L	S_calcarine__Left	Calcarine sulcus	Left
88	caS_R	S_calcarine__Right	Calcarine sulcus	Right
89	CS_L	S_central__Left	Central sulcus (Rolando's fissure)	Left
90	CS_R	S_central__Right	Central sulcus (Rolando's fissure)	Right
91	CISmrg_L	S_cingul-Marginalis__Left	Marginal branch (or part) of the cingulate sulcus	Left
92	CISmrg_R	S_cingul-Marginalis__Right	Marginal branch (or part) of the cingulate sulcus	Right
93	aINS_L	S_circular_insula_ant__Left	Anterior segment of the circular sulcus of the insula	Left
94	aINS_R	S_circular_insula_ant__Right	Anterior segment of the circular sulcus of the insula	Right
95	iINS_L	S_circular_insula_inf__Left	Inferior segment of the circular sulcus of the insula	Left
96	iINS_R	S_circular_insula_inf__Right	Inferior segment of the circular sulcus of the insula	Right
97	sINS_L	S_circular_insula_sup__Left	Superior segment of the circular sulcus of the insula	Left
98	sINS_R	S_circular_insula_sup__Right	Superior segment of the circular sulcus of the insula	Right
99	acolS_L	S_collat_transv_ant__Left	Anterior transverse collateral sulcus	Left
100	acolS_R	S_collat_transv_ant__Right	Anterior transverse collateral sulcus	Right
101	pcolS_L	S_collat_transv_post__Left	Posterior transverse collateral sulcus	Left
102	pcolS_R	S_collat_transv_post__Right	Posterior transverse collateral sulcus	Right
103	iFS_L	S_front_inf__Left	Inferior frontal sulcus	Left
104	iFS_R	S_front_inf__Right	Inferior frontal sulcus	Right
105	mFS_L	S_front_middle__Left	Middle frontal sulcus	Left
106	mFS_R	S_front_middle__Right	Middle frontal sulcus	Right
107	sFS_L	S_front_sup__Left	Superior frontal sulcus	Left
108	sFS_R	S_front_sup__Right	Superior frontal sulcus	Right
109	jnS_L	S_interm_prim-Jensen__Left	Sulcus intermedius primus (of Jensen)	Left
110	jnS_R	S_interm_prim-Jensen__Right	Sulcus intermedius primus (of Jensen)	Right
111	intPS_L	S_intrapariet_and_P_trans__Left	Intraparietal sulcus (interparietal sulcus) and transverse parietal sulci	Left
112	intPS_R	S_intrapariet_and_P_trans__Right	Intraparietal sulcus (interparietal sulcus) and transverse parietal sulci	Right
113	mOS_L	S_oc_middle_and_Lunatus__Left	Middle occipital sulcus and lunatus sulcus	Left
114	mOS_R	S_oc_middle_and_Lunatus__Right	Middle occipital sulcus and lunatus sulcus	Right
115	sOS_L	S_oc_sup_and_transversal__Left	Superior occipital sulcus and transverse occipital sulcus	Left
116	sOS_R	S_oc_sup_and_transversal__Right	Superior occipital sulcus and transverse occipital sulcus	Right
117	aOS_L	S_occipital_ant__Left	Anterior occipital sulcus and preoccipital notch (temporo-occipital incisure)	Left
118	aOS_R	S_occipital_ant__Right	Anterior occipital sulcus and preoccipital notch (temporo-occipital incisure)	Right
119	laOTS_L	S_oc-temp_lat__Left	Lateral occipito-temporal sulcus	Left
120	laOTS_R	S_oc-temp_lat__Right	Lateral occipito-temporal sulcus	Right
121	meOTS_L	S_oc-temp_med_and_Lingual__Left	Medial occipito-temporal sulcus (collateral sulcus) and lingual sulcus	Left
122	meOTS_R	S_oc-temp_med_and_Lingual__Right	Medial occipito-temporal sulcus (collateral sulcus) and lingual sulcus	Right
123	orbSla_L	S_orbital_lateral__Left	Lateral orbital sulcus	Left
124	orbSla_R	S_orbital_lateral__Right	Lateral orbital sulcus	Right
125	orbSme_L	S_orbital_med-olfact__Left	Medial orbital sulcus (olfactory sulcus)	Left
126	orbSme_R	S_orbital_med-olfact__Right	Medial orbital sulcus (olfactory sulcus)	Right
127	orbS_L	S_orbital-H_Shaped__Left	Orbital sulci (H-shaped sulci)	Left
128	orbS_R	S_orbital-H_Shaped__Right	Orbital sulci (H-shaped sulci)	Right
129	POS_L	S_parieto_occipital__Left	Parieto-occipital sulcus (or fissure)	Left
130	POS_R	S_parieto_occipital__Right	Parieto-occipital sulcus (or fissure)	Right
131	pecalS_L	S_pericallosal__Left	Pericallosal sulcus (S of corpus callosum)	Left
132	pecalS_R	S_pericallosal__Right	Pericallosal sulcus (S of corpus callosum)	Right
133	poCS_L	S_postcentral__Left	Postcentral sulcus	Left
134	poCS_R	S_postcentral__Right	Postcentral sulcus	Right
135	iprCS_L	S_precentral-inf-part__Left	Inferior part of the precentral sulcus	Left
136	iprCS_R	S_precentral-inf-part__Right	Inferior part of the precentral sulcus	Right
137	sprCS_L	S_precentral-sup-part__Left	Superior part of the precentral sulcus	Left
138	sprCS_R	S_precentral-sup-part__Right	Superior part of the precentral sulcus	Right
139	suborbS_L	S_suborbital__Left	Suborbital sulcus (sulcus rostrales, supraorbital sulcus)	Left
140	suborbS_R	S_suborbital__Right	Suborbital sulcus (sulcus rostrales, supraorbital sulcus)	Right
141	subPS_L	S_subparietal__Left	Subparietal sulcus	Left
142	subPS_R	S_subparietal__Right	Subparietal sulcus	Right
143	iTS_L	S_temporal_inf__Left	Inferior temporal sulcus	Left
144	iTS_R	S_temporal_inf__Right	Inferior temporal sulcus	Right
145	sTS_L	S_temporal_sup__Left	Superior temporal sulcus (parallel sulcus)	Left
146	sTS_R	S_temporal_sup__Right	Superior temporal sulcus (parallel sulcus)	Right
147	trTS_L	S_temporal_transverse__Left	Transverse temporal sulcus	Left
148	trTS_R	S_temporal_transverse__Right	Transverse temporal sulcus	Right
