# Supplementary material for: Cross-frequency synchronization connects networks of fast and slow oscillations during visual working memory maintenance
Source: eLife. 2016 Sep 26;5:e13451. doi: 10.7554/eLife.13451 (PMC5070951; doi:10.7554/eLife.13451)
Supplement: Figure 6—source data 1. — Connection density K of significant CFS connections within and between functional brain systems and 95th percentile for K from 5000 randomized surrogate graphs. The low-frequency subsystems are given in rows and the high-frequency subsystems in columns. Vis=Visual, SM=sensorimotor, DA=dorsal attention, VA=ventral attention, Lim=Limbic, FP=frontoparietal, DM=default mode DOI: http://dx.doi.org/10.7554/eLife.13451.022 [file elife-13451-fig6-data1.xlsx]

## Sheet: fg
				Vis	SM	DA	VA	Lim	FP	DM						Vis	SM	DA	VA	Lim	FP	DM
	Theta Mean, pos, 1:2-1:9	K	Vis	0.25	0.349702	0.4	0.180556	0.1875	0.280612	0.236175			Low-alpha Mean, neg , 1:2 ̶ 1:9	K	Vis	0.179894	0.209821	0.246429	0.111111	0.117857	0.206633	0.173963
			SM	0.308036	0.382246	0.4	0.226852	0.235417	0.35119	0.293011					SM	0.21131	0.251812	0.3125	0.180556	0.172917	0.247024	0.236559
			DA	0.353571	0.4375	0.666665	0.255556	0.35	0.435714	0.33871					DA	0.25	0.3125	0.433333	0.222222	0.2	0.364286	0.277419
			VA	0.180556	0.25463	0.288889	0.156862	0.15	0.242063	0.218638					VA	0.138889	0.194444	0.205556	0.0816993	0.0833333	0.178571	0.12724
			Lim	0.182143	0.239583	0.27	0.122222	0.126316	0.207143	0.146774					Lim	0.116071	0.19375	0.165	0.0916667	0.102632	0.139286	0.124194
			FP	0.270408	0.389881	0.457143	0.234127	0.221429	0.285714	0.251152					FP	0.178571	0.294643	0.378571	0.190476	0.171429	0.241758	0.221198
			DM	0.232719	0.317204	0.312903	0.216846	0.175806	0.232719	0.229032					DM	0.173963	0.233871	0.270968	0.129032	0.116129	0.186636	0.15914
				Vis	SM	DA	VA	Lim	FP	DM						Vis	SM	DA	VA	Lim	FP	DM
		95 %ile	Vis	0.34127	0.313988	0.342857	0.323413	0.321429	0.331633	0.309908				95 %ile	Vis	0.251323	0.233631	0.253571	0.238095	0.235714	0.242347	0.226959
			SM	0.316964	0.349638	0.341667	0.328704	0.325	0.33631	0.311828					SM	0.232143	0.256341	0.258333	0.240741	0.238542	0.244048	0.230511
			DA	0.342857	0.345833	0.422222	0.35	0.355	0.364286	0.340323					DA	0.253571	0.258333	0.322222	0.261111	0.26	0.271429	0.251613
			VA	0.323413	0.328704	0.35	0.372549	0.330556	0.34127	0.320789					VA	0.238095	0.240741	0.261111	0.271242	0.241667	0.253968	0.236559
			Lim	0.321429	0.325	0.35	0.333333	0.363158	0.339286	0.320161					Lim	0.2375	0.239583	0.26	0.244444	0.265789	0.25	0.233871
			FP	0.331633	0.33631	0.357143	0.34127	0.342857	0.384615	0.329493					FP	0.244898	0.25	0.271429	0.253968	0.253571	0.291209	0.24424
			DM	0.309908	0.313172	0.33871	0.320789	0.320968	0.329493	0.336559					DM	0.226959	0.229839	0.251613	0.236559	0.233871	0.241935	0.245161
				Vis	SM	DA	VA	Lim	FP	DM						Vis	SM	DA	VA	Lim	FP	DM
	High-alpha Mean, pos, 1:3 - 1:9	K	Vis	0.119048	0.139881	0.185714	0.103175	0.0910714	0.104592	0.119816			High-alpha Mean, pos, 1:2	K	Vis	0.0198413	0.0386905	0.0464286	0.0257937	0.025	0.0484694	0.0322581
			SM	0.162202	0.173913	0.25	0.134259	0.14375	0.202381	0.163978					SM	0.0639881	0.150362	0.1375	0.0648148	0.0666667	0.104167	0.0725806
			DA	0.192857	0.245833	0.311111	0.116667	0.165	0.25	0.158065					DA	0.0321429	0.154167	0.144444	0.111111	0.105	0.0928571	0.0774194
			VA	0.10119	0.108796	0.138889	0.0849675	0.0666667	0.142857	0.111111					VA	0.0277778	0.0925926	0.111111	0.0392157	0.025	0.0873016	0.0358423
			Lim	0.123214	0.10625	0.185	0.0611111	0.0842105	0.117857	0.1					Lim	0.0232143	0.04375	0.03	0.0222222	0.0210526	0.0392857	0.0322581
			FP	0.137755	0.205357	0.278571	0.134921	0.164286	0.153846	0.156682					FP	0.0229592	0.0803571	0.0642857	0.031746	0.0464286	0.0604396	0.0391705
			DM	0.147465	0.134409	0.164516	0.0824373	0.109677	0.129032	0.129032					DM	0.0334101	0.0685484	0.0516129	0.0394265	0.0451613	0.0599078	0.0430108
				Vis	SM	DA	VA	Lim	FP	DM						Vis	SM	DA	VA	Lim	FP	DM
		95 %ile	Vis	0.185185	0.172619	0.192857	0.180556	0.178571	0.183673	0.170507				95 %ile	Vis	0.0780423	0.0729167	0.0821429	0.077381	0.075	0.0790816	0.0714286
			SM	0.172619	0.195652	0.191667	0.18287	0.179167	0.184524	0.170699					SM	0.0729167	0.0797101	0.0833333	0.0787037	0.0770833	0.0803571	0.0725806
			DA	0.189286	0.195833	0.244445	0.2	0.2	0.214286	0.190323					DA	0.0857143	0.0875	0.111111	0.0944444	0.09	0.0928571	0.083871
			VA	0.180556	0.185185	0.2	0.202615	0.183333	0.198413	0.179211					VA	0.0753968	0.0787037	0.0888889	0.0882353	0.0805556	0.0833333	0.0752688
			Lim	0.178571	0.18125	0.2	0.190278	0.202631	0.192857	0.177419					Lim	0.075	0.075	0.09	0.0805556	0.0868421	0.0821429	0.0741935
			FP	0.183673	0.186012	0.207143	0.194444	0.192857	0.225274	0.184332					FP	0.0790816	0.0833333	0.0928571	0.0833333	0.0857143	0.0989011	0.078341
			DM	0.168203	0.172043	0.183871	0.175627	0.177419	0.184332	0.185484					DM	0.0714286	0.0712366	0.0806452	0.0752688	0.0741935	0.078341	0.0763441
				Vis	SM	DA	VA	Lim	FP	DM						Vis	SM	DA	VA	Lim	FP	DM
	High-alpha Load, pos, 1:3 - 1:9	K	Vis	0.0343915	0.0372024	0.0392857	0.00992063	0.0160714	0.0229592	0.0195853			High-alpha Load, pos, 1:2	K	Vis	0.031746	0.0729167	0.05	0.0376984	0.0214286	0.0357143	0.0483871
			SM	0.0386905	0.061594	0.05	0.025463	0.025	0.0208333	0.0241935					SM	0.0907738	0.230072	0.2375	0.134259	0.0729167	0.157738	0.13172
			DA	0.0214286	0.0291667	0.0111111	0.0166667	0.01	0.0571429	0.0193548					DA	0.0678571	0.266667	0.255556	0.0944444	0.055	0.128571	0.083871
			VA	0.0178571	0.0138889	0.0222222	0.00653595	0.00555556	0.015873	0.0125448					VA	0.0337302	0.122685	0.105556	0.0326797	0.0388889	0.047619	0.0752688
			Lim	0.0125	0.00833333	0.005	0.0166667	0.0105263	0.0428571	0.0193548					Lim	0.0285714	0.0541667	0.07	0.0166667	0.0105263	0.0428571	0.0435484
			FP	0.0255102	0.0178571	0.0285714	0.0198413	0.0107143	0.0384615	0.016129					FP	0.0484694	0.157738	0.107143	0.0833333	0.0464286	0.0824176	0.062212
			DM	0.0172811	0.030914	0.0258065	0.0107527	0.0193548	0.0368664	0.016129					DM	0.0529954	0.107527	0.0870968	0.0663082	0.0387097	0.0460829	0.0612903
				Vis	SM	DA	VA	Lim	FP	DM						Vis	SM	DA	VA	Lim	FP	DM
		95 %ile	Vis	0.0343915	0.0342262	0.0392857	0.0357143	0.0357143	0.0357143	0.0322581				95 %ile	Vis	0.113757	0.102679	0.114286	0.107143	0.105357	0.109694	0.0996544
			SM	0.0327381	0.0362319	0.0416667	0.0347222	0.0354167	0.0386905	0.0336022					SM	0.102679	0.115942	0.116667	0.108796	0.10625	0.110119	0.100806
			DA	0.0392857	0.0416667	0.0555555	0.0444444	0.045	0.0428571	0.0387097					DA	0.117857	0.120833	0.155556	0.122222	0.125	0.128571	0.116129
			VA	0.0357143	0.037037	0.0444444	0.0392157	0.0388889	0.0396825	0.0340502					VA	0.107143	0.108796	0.122222	0.130719	0.111111	0.119048	0.105735
			Lim	0.0339286	0.0354167	0.045	0.0388889	0.0394737	0.0392857	0.033871					Lim	0.105357	0.108333	0.12	0.108333	0.121053	0.114286	0.104839
			FP	0.0382653	0.0386905	0.0428571	0.0436508	0.0392857	0.0439561	0.0368664					FP	0.112245	0.113095	0.128571	0.119048	0.117857	0.137363	0.110599
			DM	0.0322581	0.0322581	0.0387097	0.0358423	0.033871	0.0368664	0.0333333					DM	0.0990783	0.100806	0.112903	0.105735	0.103226	0.108295	0.109677
