# Supplementary material for: Cross-frequency synchronization connects networks of fast and slow oscillations during visual working memory maintenance
Source: eLife. 2016 Sep 26;5:e13451. doi: 10.7554/eLife.13451 (PMC5070951; doi:10.7554/eLife.13451)
Supplement: Figure 7—source data 1. — Statistical r and p values for the correlation between vertex degree values of the LF and HF CFS hubs with the corresponding hubs of the within-frequency synchronized networks estimated with Pearson´s correlation test. Values are corrected for multiple comparisons by Benjamini-Hochberg FDR method. Correlations with p < 0.05 are marked in green when significant after correction for multiple comparisons with Benjamini-Hochberg or yellow if not significant after correction. DOI: http://dx.doi.org/10.7554/eLife.13451.024 [file elife-13451-fig7-data1.xlsx]

## Sheet: Sheet1
		Correlation	LF band	ratios	r	p
		LF 1:1 PS with LF_CFS	theta	1:2 - 1:3	0.339454	0.000996
			theta	1:4 - 1:5	0.254298	0.014997
			theta	1:6 - 1:9	0.234742	0.025108
			hi-alpha	1:2	0.51969	1.3e-07
			hi-alpha	1:3 - 1:5	0.349821	0.000676
			hi-alpha	1:6 - 1:8	0.371892	0.000284
		HF 1:1 PS with HF_CFS	theta	1:2 - 1:3	0.291053	0.005127
			theta	1:4 - 1:5	0.16529	0.117405
			theta	1:6 - 1:9	0.259014	0.013171
			hi-alpha	1:2	0.0822035	0.43855
			hi-alpha	1:3 - 1:5	0.218374	0.037569
			hi-alpha	1:6 - 1:8	-0.0820802	0.43924
