# Supplementary material for: Cross-frequency synchronization connects networks of fast and slow oscillations during visual working memory maintenance
Source: eLife. 2016 Sep 26;5:e13451. doi: 10.7554/eLife.13451 (PMC5070951; doi:10.7554/eLife.13451)
Supplement: Figure 9—source data 1. — Pearson´s correlation coefficients r and p values for the correlation of CFS and PAC network strength with subject's individual VWM capacity. Correlations with p < 0.05 are marked in green when significant after correction for multiple comparisons with Benjamini-Hochberg or yellow if not significant after correction. DOI: http://dx.doi.org/10.7554/eLife.13451.031 [file elife-13451-fig9-data1.xlsx]

## Sheet: Sheet1
			Freq[Hz]	3.326	3.796	4.344	4.91	5.543	6.639	7.564	8.664	9.796	11.153	13.179	15.1
CF type	ratios
CFS	low ratios (1:2-1:5)	r		-0.031576	0.0904983	0.0611951	0.09665	-0.12728	0.0257453	-0.0775503	0	0	0.141362	0.342843	-0.136662
		p		0.792313	0.449639	0.609597	0.419296	0.286675	0.830026	0.517311	1	1	0.23623	0.00319713	0.252335
	high ratios (1:6-1:9)	r		0.0457281	-0.201996	0.133977	-0.20776	-0.106986	0.376602	0.0732394	0.0776329	0	0	0.16664	-0.00873399
		p		0.702888	0.0888338	0.261862	0.0799092	0.371058	0.00111181	0.540933	0.516864	1	1	0.161799	0.941954
CFS	1:2	r		0	0	0	0	-0.0146644	0.094492	0	0	0	0.120546	0.247174	-0.0182743
		p		1	1	1	1	0.902693	0.429804	1	1	1	0.313144	0.0363282	0.878902
	1:3-1:5	r		-0.031576	0.0904983	0.0611951	0.09665	-0.144405	-0.0255612	-0.0775503	0	0	0.0901808	0.276233	-0.164028
		p		0.792313	0.449639	0.609597	0.419296	0.226191	0.831223	0.517311	1	1	0.451237	0.0188342	0.168571
PAC	low ratios (1:2-1:5)	r		0.217436	0.185597	0.200618	0.0667117	0.115304	-0.0451338	-0.0443212	0.1088	-0.0412166	-0.160081	-0.0246729	0.232219
		p		0.0665447	0.118553	0.0910793	0.577677	0.334801	0.706573	0.711623	0.362958	0.731027	0.179195	0.837007	0.0496597
	high ratios (1:6-1:9)	r		-0.0425228	0.0887013	-0.0449373	0.0997202	0.0730524	-0.100802	-0.217036	0.253046	0	-0.114968	0	0
		p		0.722841	0.458727	0.707793	0.404605	0.54197	0.399503	0.0670588	0.0319831	1	0.336222	1	1
