# Supplementary material for: Cross-frequency synchronization connects networks of fast and slow oscillations during visual working memory maintenance
Source: eLife. 2016 Sep 26;5:e13451. doi: 10.7554/eLife.13451 (PMC5070951; doi:10.7554/eLife.13451)
Supplement: Figure 9—source data 2. — Positive and negative correlations in individual ratios are given by Pearson´s correlation coefficient r. DOI: http://dx.doi.org/10.7554/eLife.13451.032 [file elife-13451-fig9-data2.xlsx]

## Sheet: Sheet1
			Freq[Hz]	3.326	3.796	4.4	4.91	5	6.639	7.564	8.664	9.796	11.153	13.179	15.1
CF type	Tail	ratio
CFS	pos	1:2		0	0	0	0	0	0.094	0	0	0	0.121	0.247	0
		1:3		0	0.09	0.068	0.171	0	0	0	0	0	0	0.143	0
		1:4		0	0	0	0	0	0	0	0	0	0	0.22	0
		1:5		0	0	0.024	0	0	0.082	0.01	0	0	0.09	0.13	0
		1:6		0.046	0	0.273	0	0	0.166	0	0	0	0	0.077	0
		1:7		0.057	0	0.035	0	0	0.146	0.017	0.117	0	0	0.167	0
		1:8		0.005	0	0	0	0.038	0.128	0.12	0	0	0	0	0
		1:9		0	0	0.093	0	0.01	0.349	0	0	0	0	0	0
	neg	1:2		0	0	0	0	-0.015	0	0	0	0	0	0	-0.018
		1:3		0	0	0	0	0	-0.093	-0.149	0	0	0	0	0
		1:4		-0.032	0	0	0	-0.067	-0.035	-0.008	0	0	0	0	-0.12
		1:5		0	0	0	-0.041	-0.132	0	0	0	0	0	0	-0.095
		1:6		0	-0.181	0	0	-0.16	0	0	0	0	0	0	-0.009
		1:7		0	0	0	0	-0.083	0	0	0	0	0	0	0
		1:8		0	0	-0.085	-0.083	0	0	0	-0.008	0	0	0	0
		1:9		-0.017	-0.116	0	-0.205	0	0	-0.017	0	0	0	0	0
PAC	pos	1:2		0.335	0.254	0.304	0.278	0.256	0.107	0.042	0.05	0	0	0	0
		1:3		0.162	0.081	0.032	0	0.17	0	0	0	0	0.003	0	0
		1:4		0	0	0.005	0	0	0	0.088	0	0	0	0	0
		1:5		0	0	0	0	0	0	0	0.167	0.081	0	0	0.232
		1:6		0	0.233	0	0	0.067	0	0	0.217	0	0	0	0
		1:7		0	0	0	0.155	0	0	0	0.138	0	0	0	0
		1:8		0	0.046	0	0.214	0.041	0	0	0	0	0	0	0
		1:9		0.059	0	0.1	0	0	0.066	0	0	0	0	0	0
	neg	1:2		0	0	0	0	0	0	0	0	-0.141	0	0	0
		1:3		0	0	0	-0.228	0	0	-0.024	-0.024	0	0	-0.009	0
		1:4		0	0	0	0	-0.105	-0.151	0	0	0	0	0	0
		1:5		-0.066	0	0	0	-0.074	-0.024	-0.176	0	0	-0.227	-0.024	0
		1:6		0	0	0	-0.18	0	-0.23	-0.172	0	0	-0.115	0	0
		1:7		-0.058	0	-0.158	0	0	-0.011	-0.021	0	0	0	0	0
		1:8		-0.07	0	0	0	0	-0.039	0	0	0	0	0	0
		1:9		0	-0.138	0	0	0	0	-0.207	0	0	0	0	0
