# Supplementary figures and images for: Cross-frequency synchronization connects networks of fast and slow oscillations during visual working memory maintenance
Source: eLife journal article supplement (doi:10.7554/elife.13451), 2016-09-26

Figure 7 - Figure Supplement 3

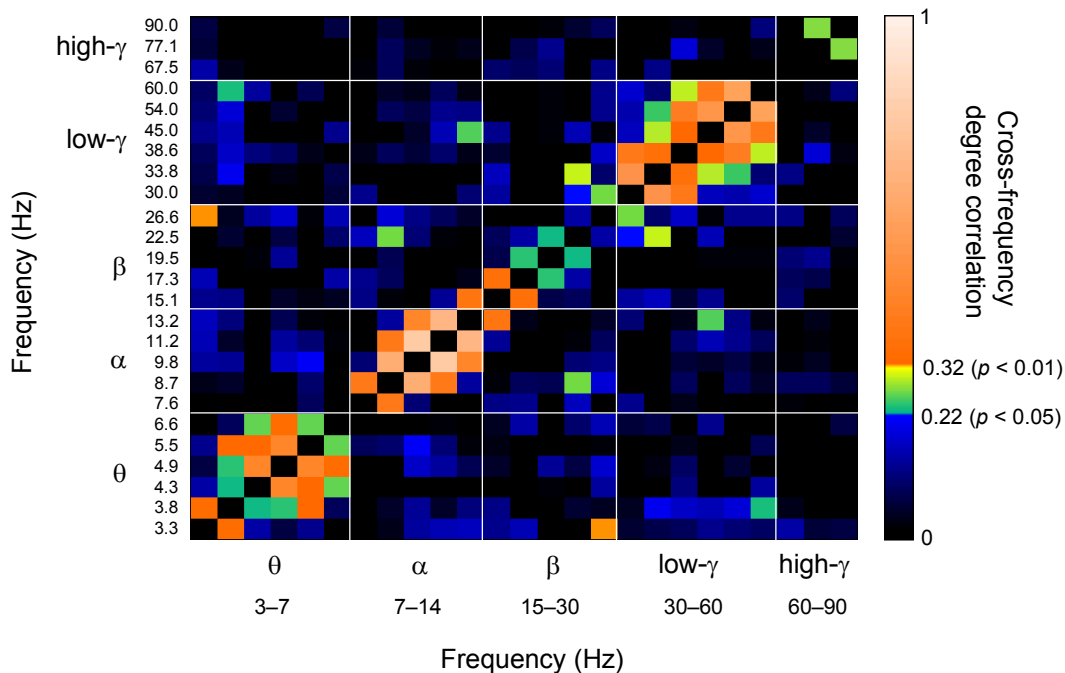

Supplement: supp [file elife-13451-supp-v1.zip]

## Figure 8 - Supplement 1

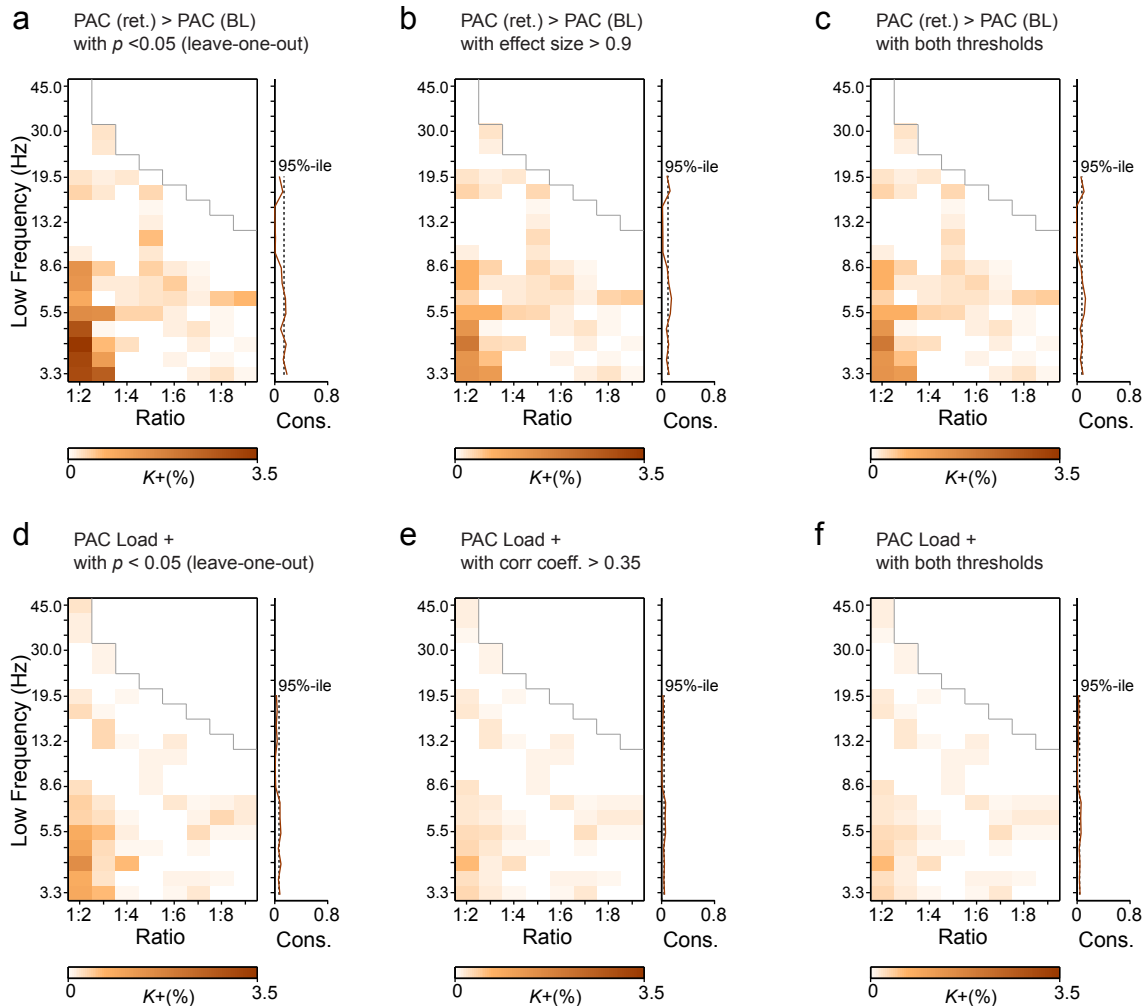

Supplement: supp [file elife-13451-supp-v1.zip]

## Figure 2 - Figure Supplement 1

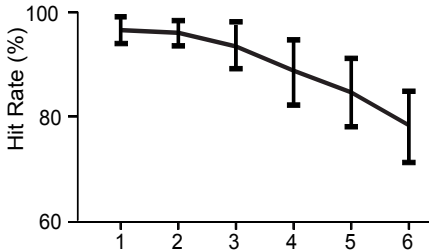

Supplement: supp [file elife-13451-supp-v1.zip]

# Figure 7 – Figure Supplement 1

a

LF-CFS connection with fast 1:1

HF-CFS connection with slow 1:1

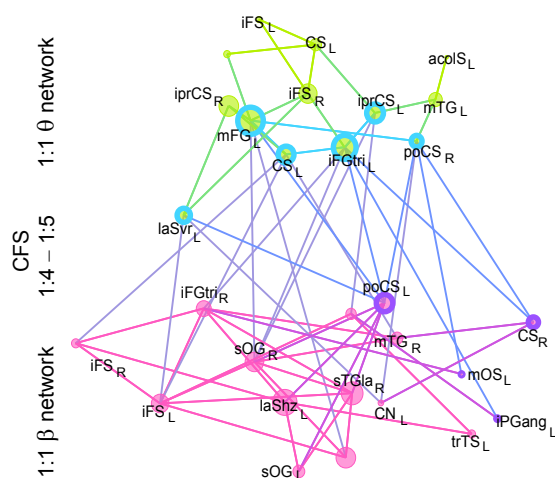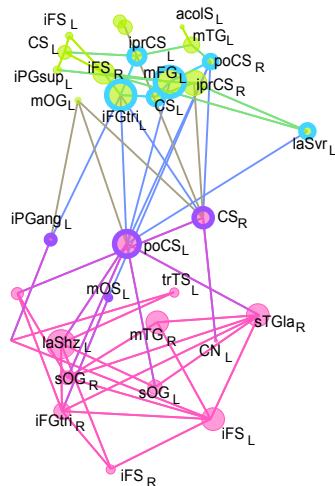

b

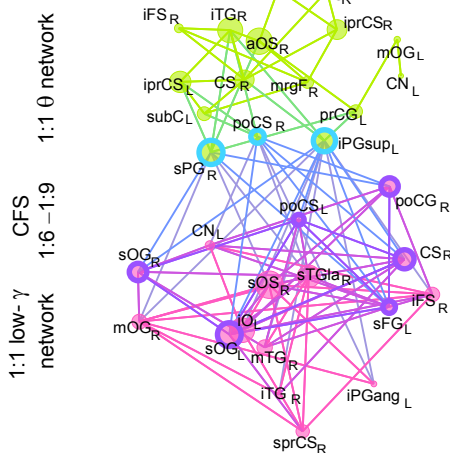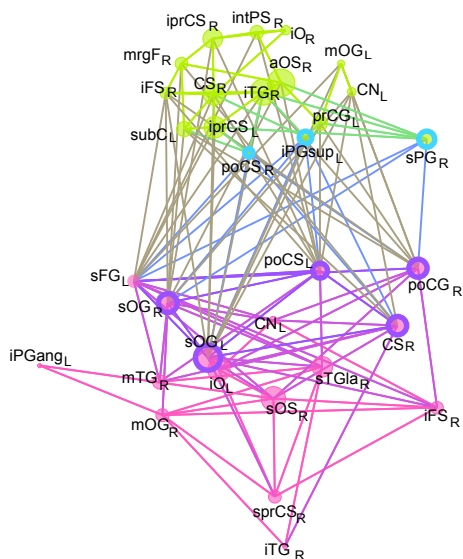

Supplement: supp [file elife-13451-supp-v1.zip]

Figure 3 - Figure Supplement 3

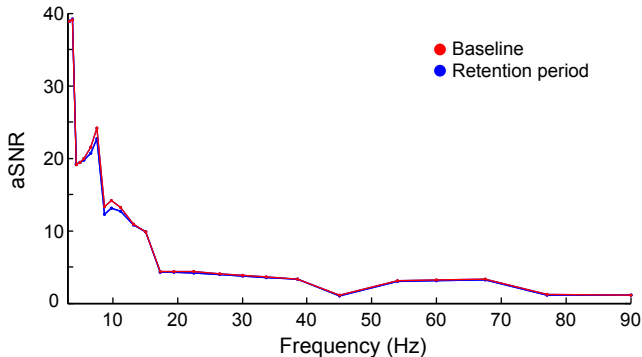

Supplement: supp [file elife-13451-supp-v1.zip]

# Figure 3 - Figure Supplement 7

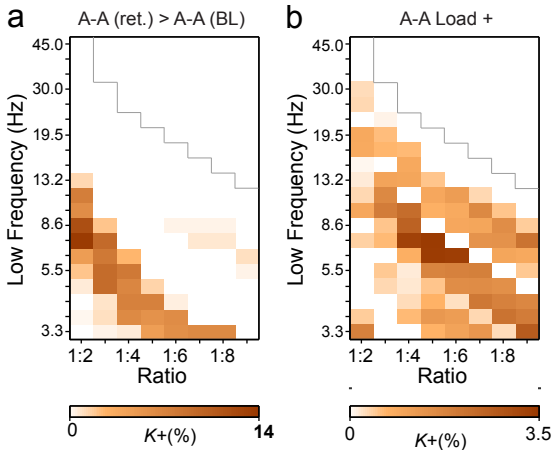

Supplement: supp [file elife-13451-supp-v1.zip]

# Figure 3 - Figure Supplement 8

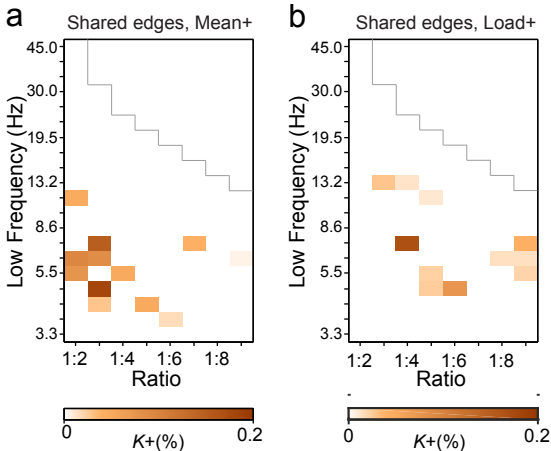

Supplement: supp [file elife-13451-supp-v1.zip]

**Figure 5 - Figure Supplement 1**

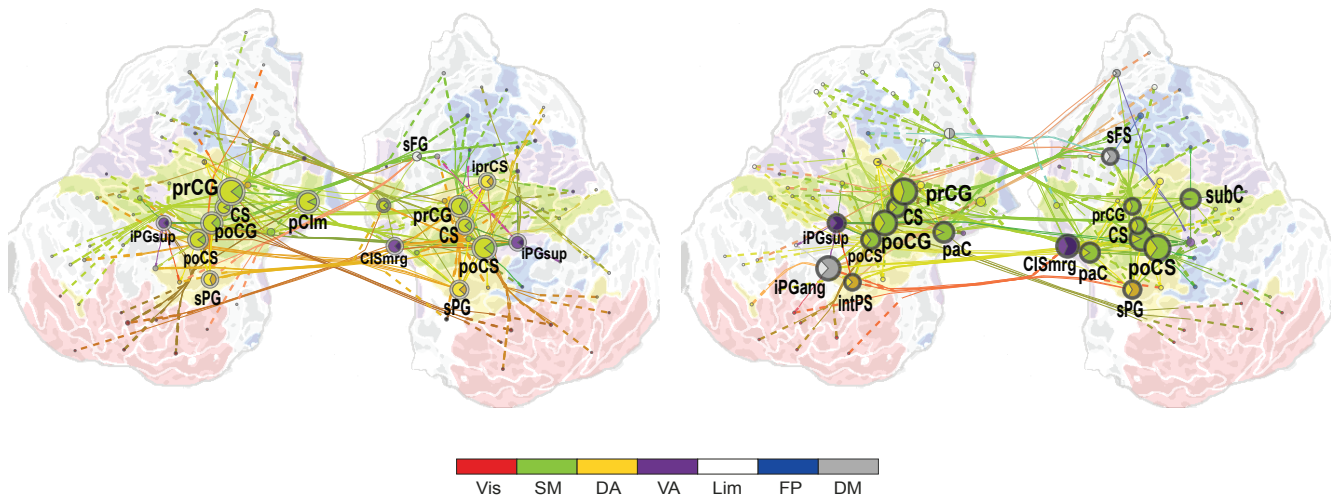

Supplement: supp [file elife-13451-supp-v1.zip]

**Figure 4 - Figure Supplement 2**

LF hubs: low- $\alpha$

HF hubs:  $\beta$ - $\gamma$

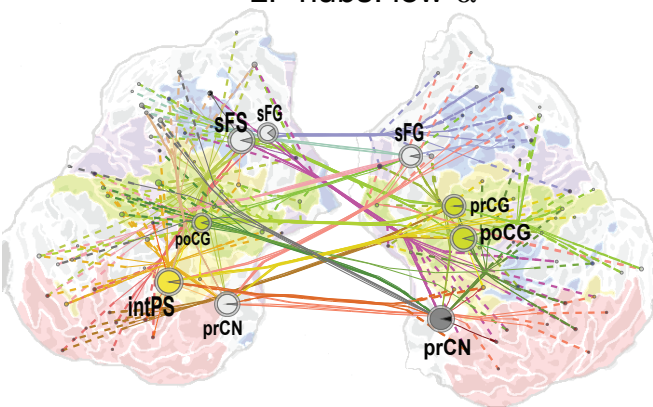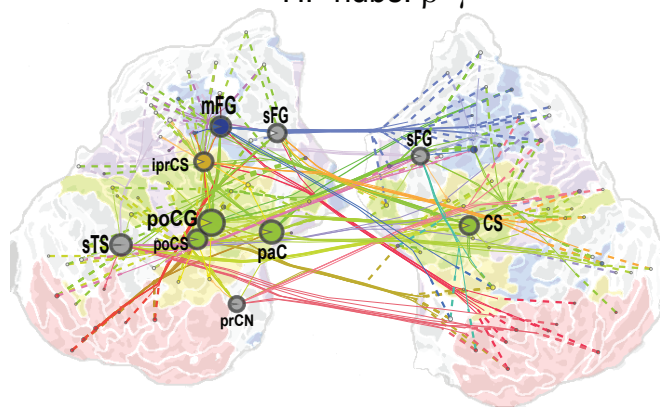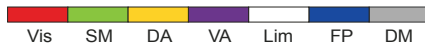

Supplement: supp [file elife-13451-supp-v1.zip]

**Figure 4 - Figure Supplement 1**

LF hubs: high- $\alpha$

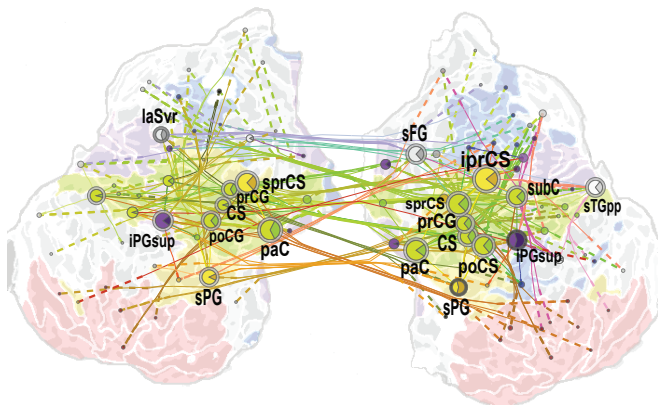

HF hubs:  $\beta$

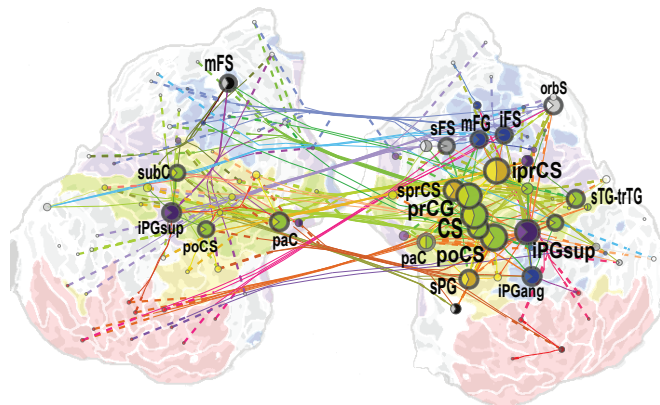

Supplement: supp [file elife-13451-supp-v1.zip]

**Figure 3 - Figure Supplement 4**

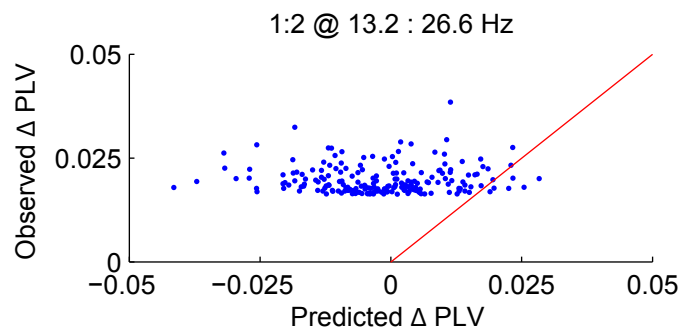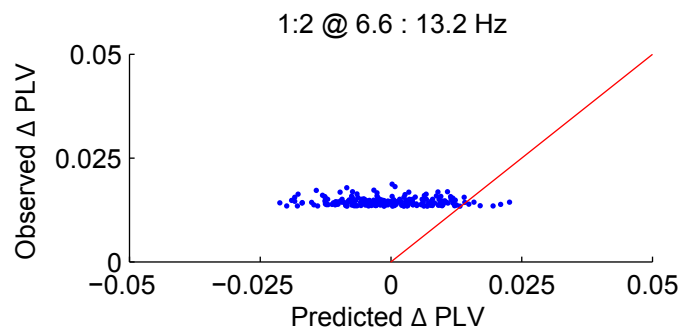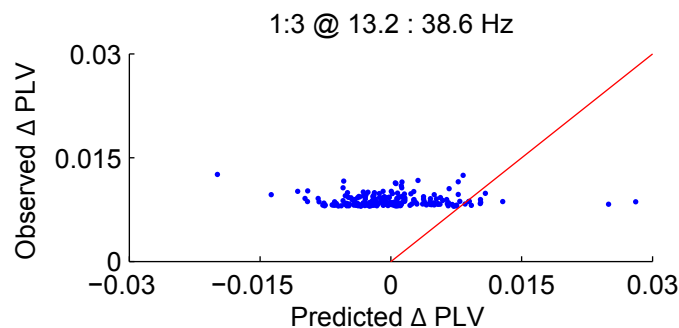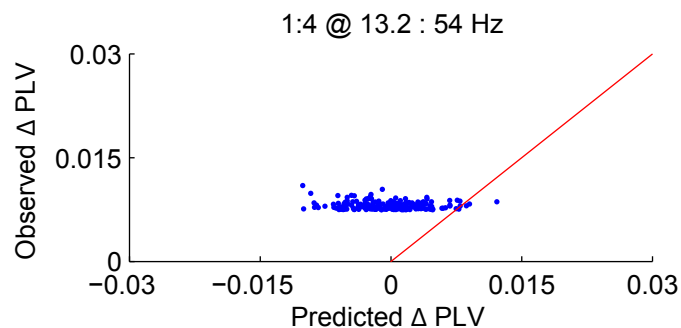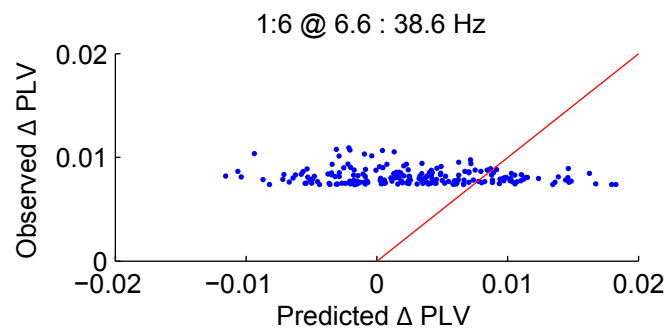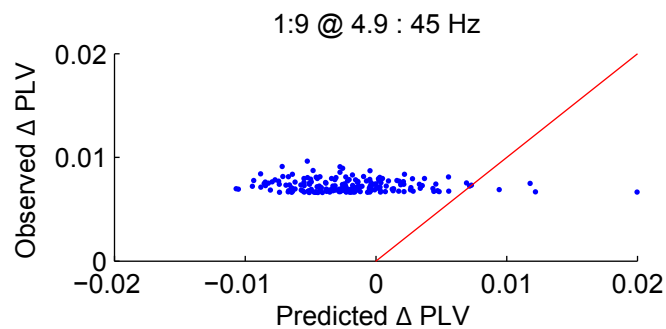

Supplement: supp [file elife-13451-supp-v1.zip]

HF-CFS connection with slow 1:1

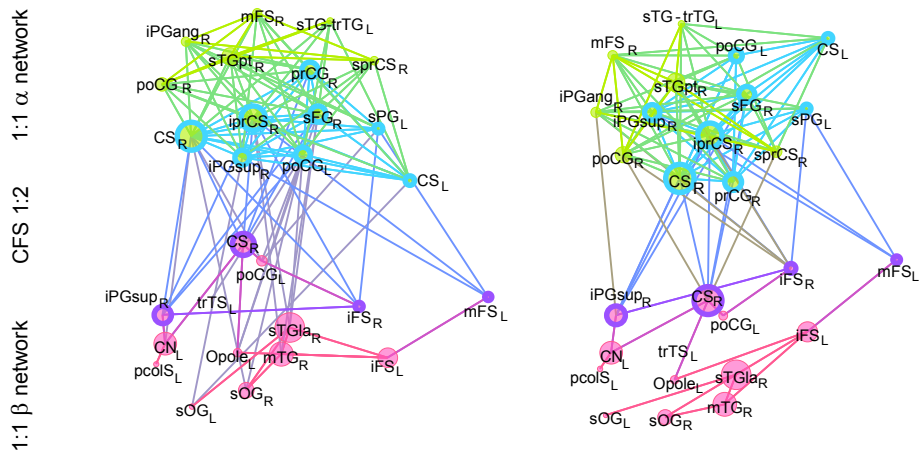

b

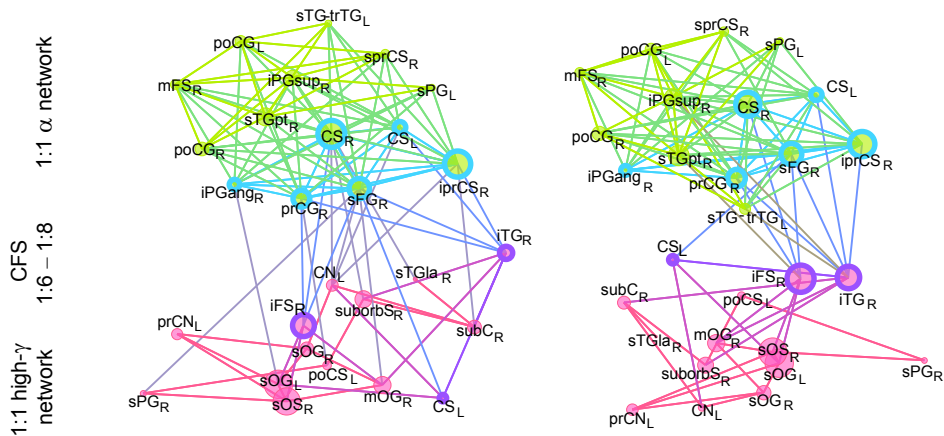

Supplement: supp [file elife-13451-supp-v1.zip]

## Figure 3 - Supplement 2

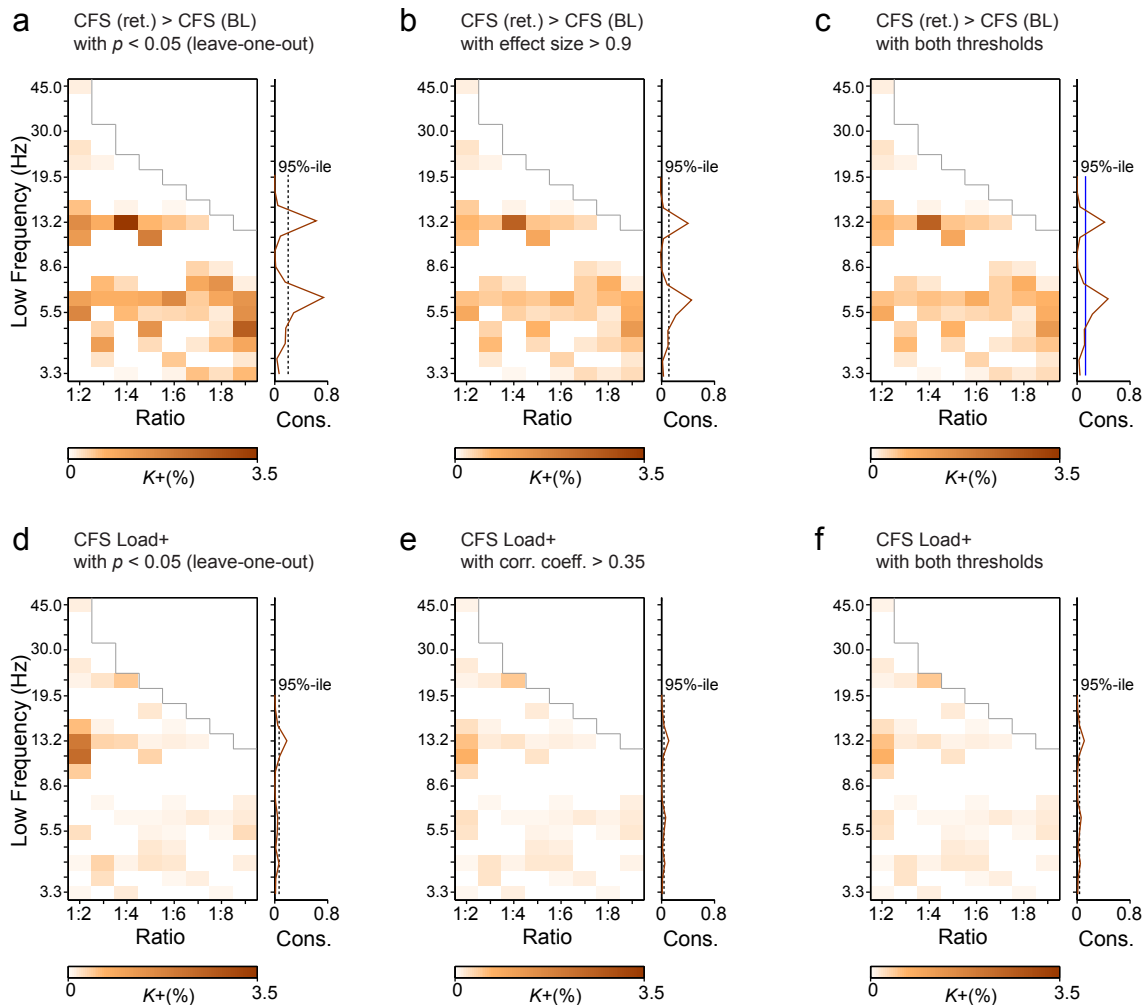

Supplement: supp [file elife-13451-supp-v1.zip]

# Figure 3 - Figure Supplement 6

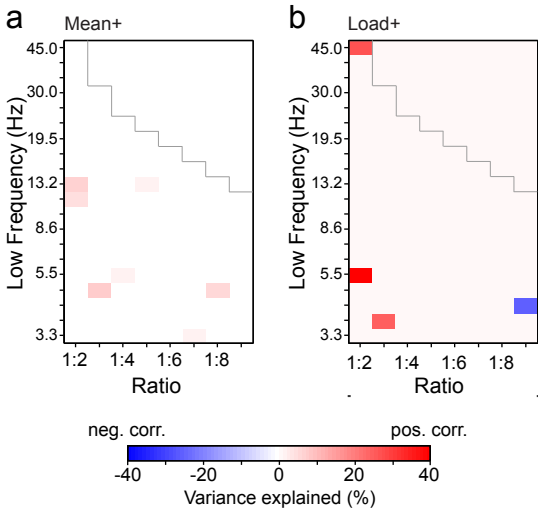

Supplement: supp [file elife-13451-supp-v1.zip]

Figure 3 – Figure Supplement 1

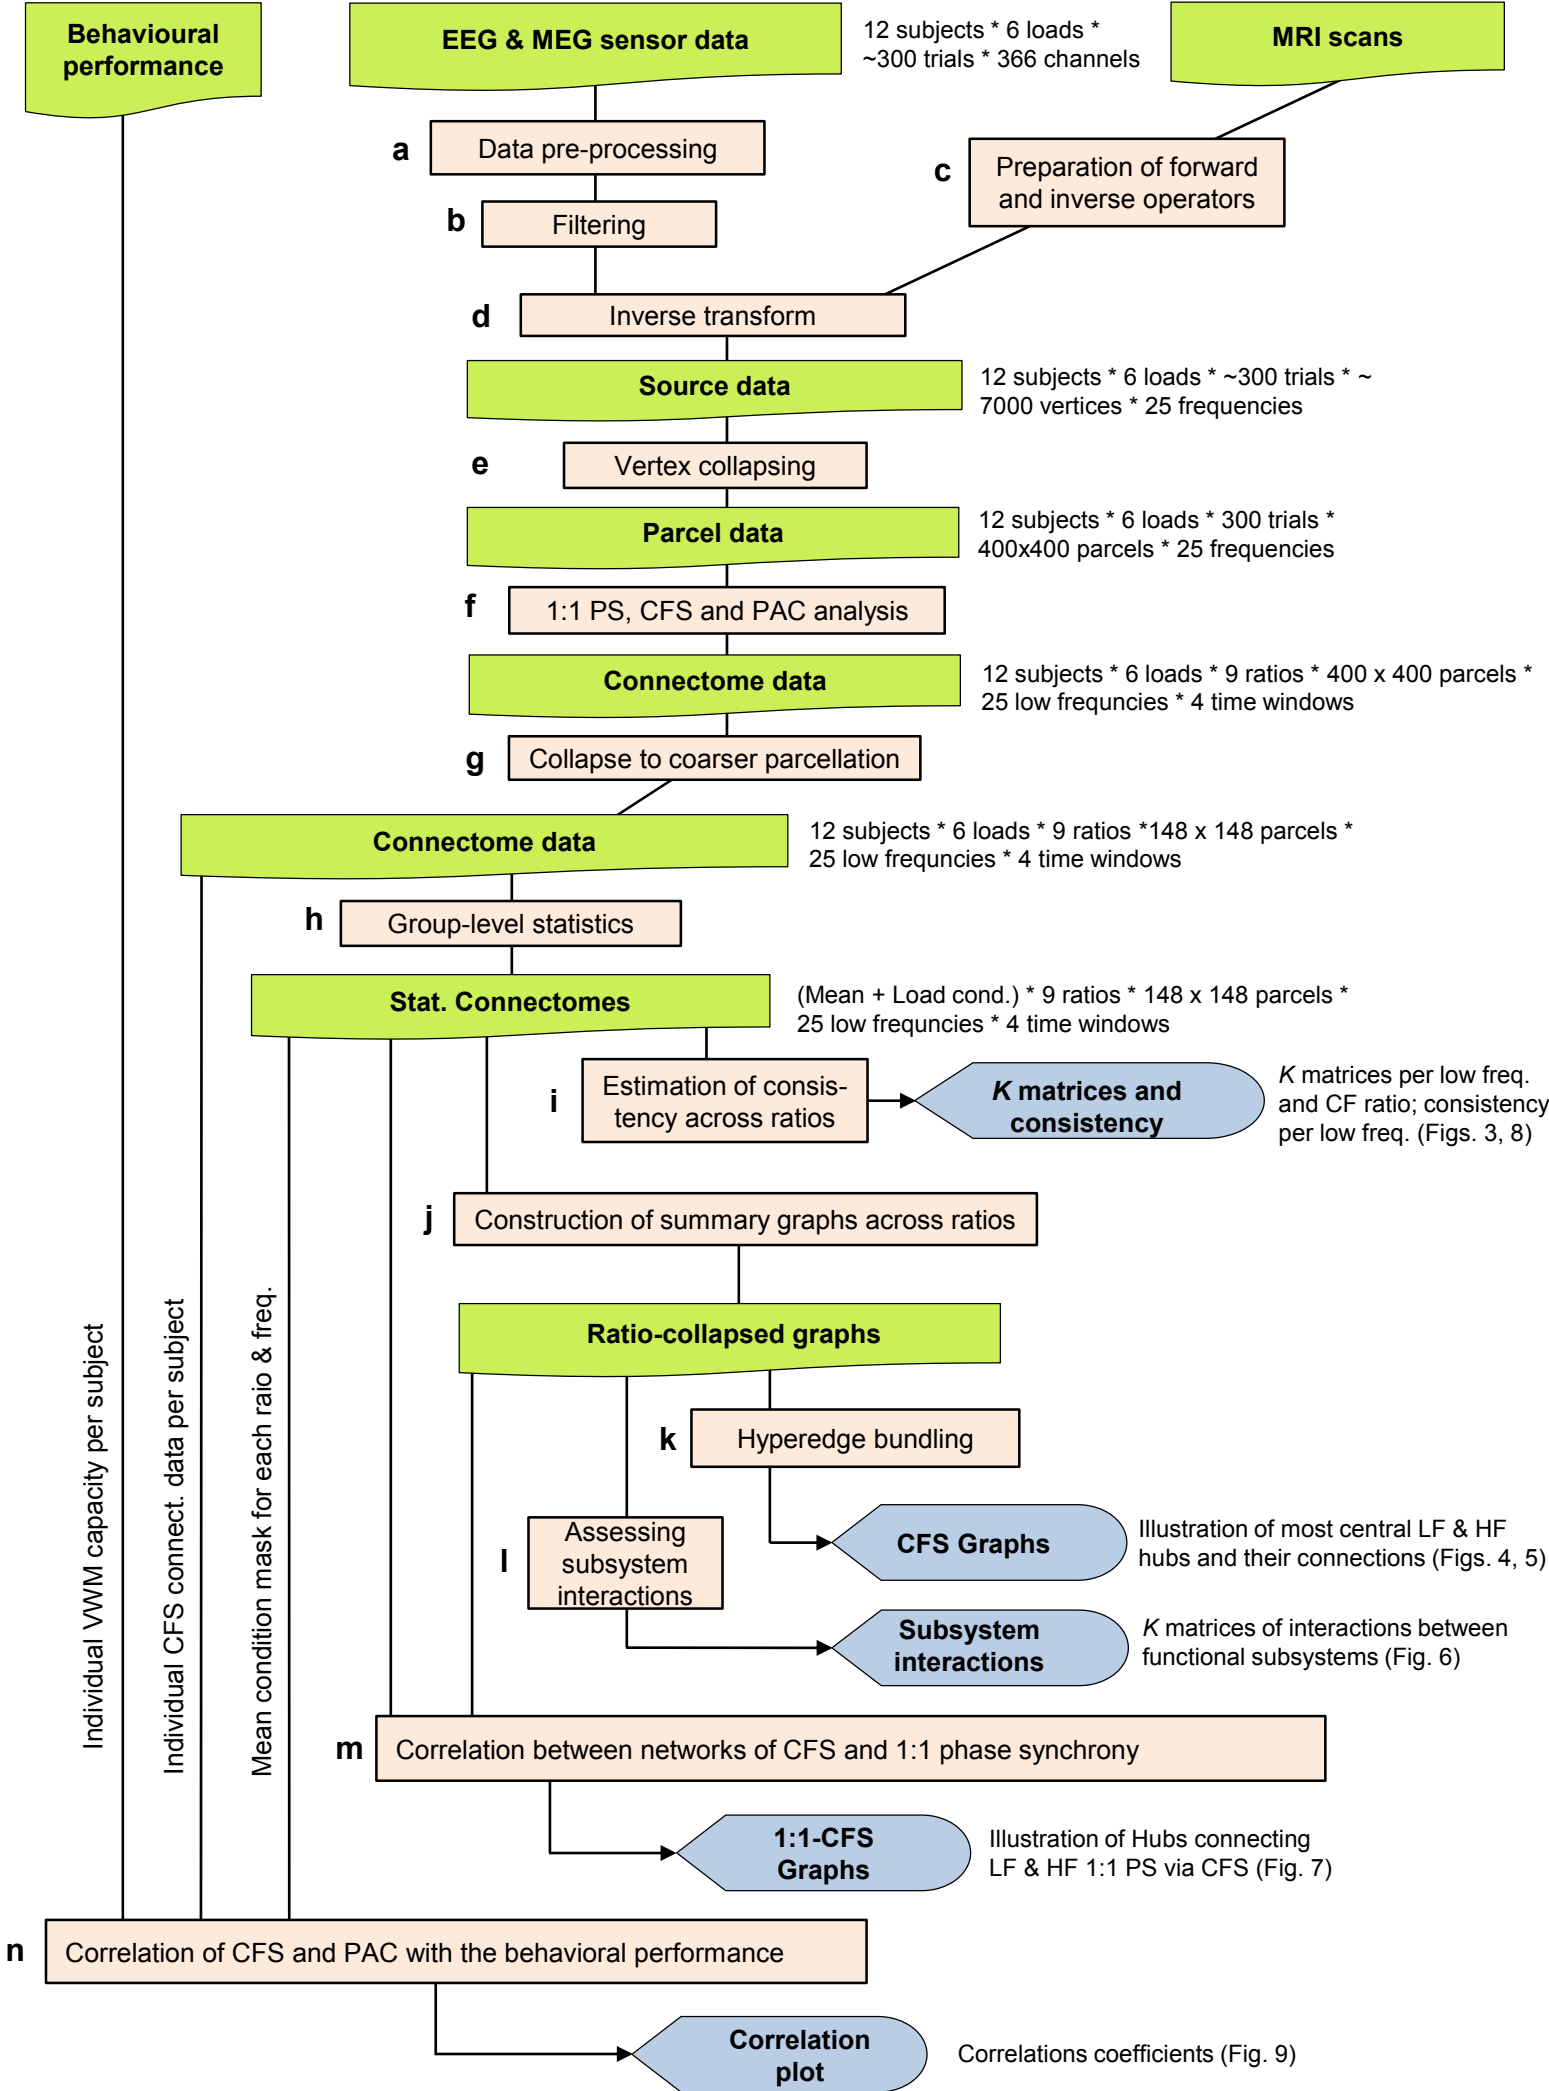

Supplement: supp [file elife-13451-supp-v1.zip]

**Figure 3 - Figure Supplement 5**

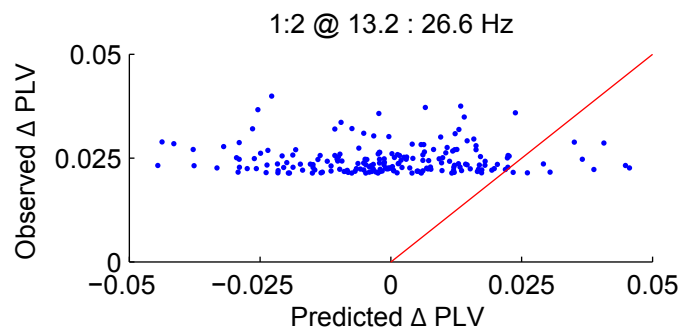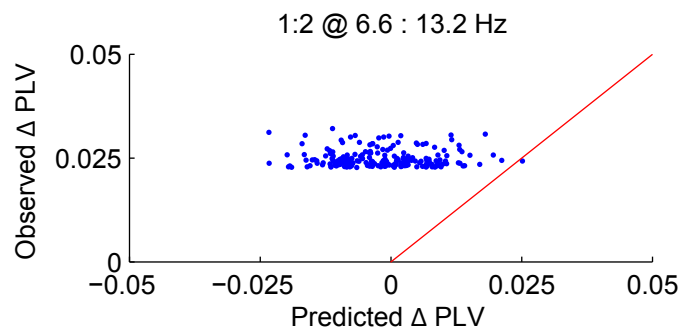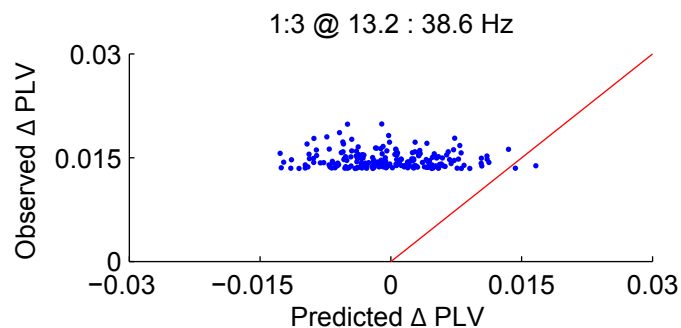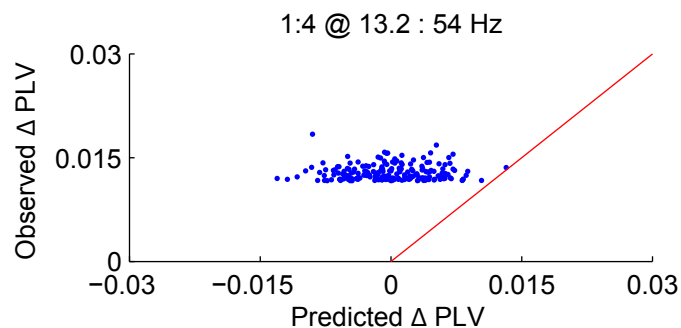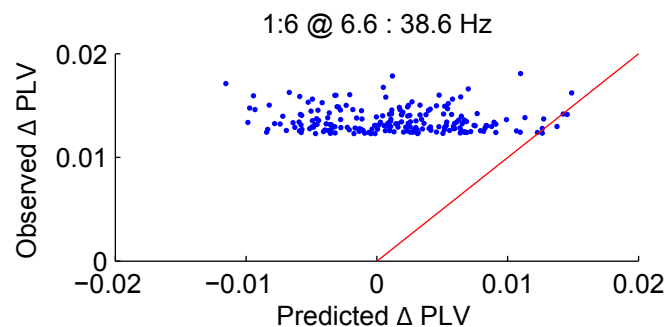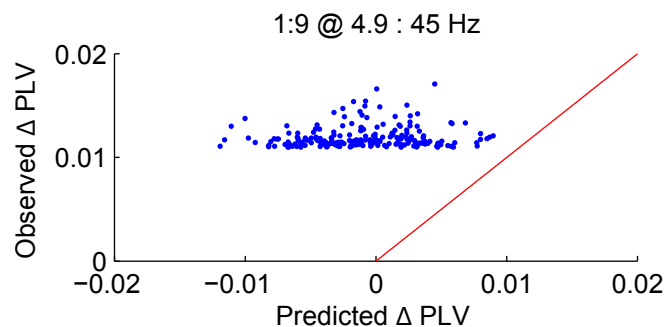

Supplement: supp [file elife-13451-supp-v1.zip]

**Figure 2 - Figure Supplement 2**

**a**

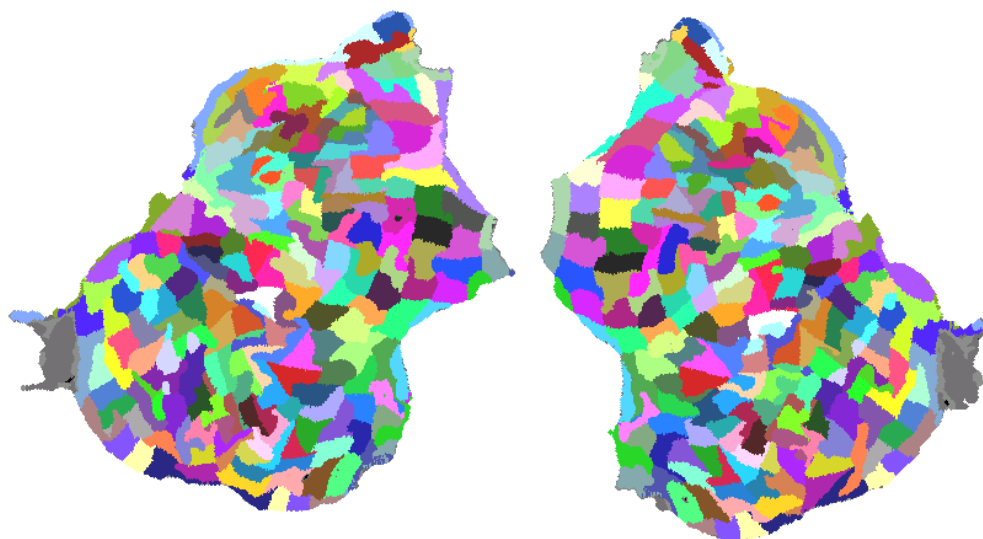

**b**

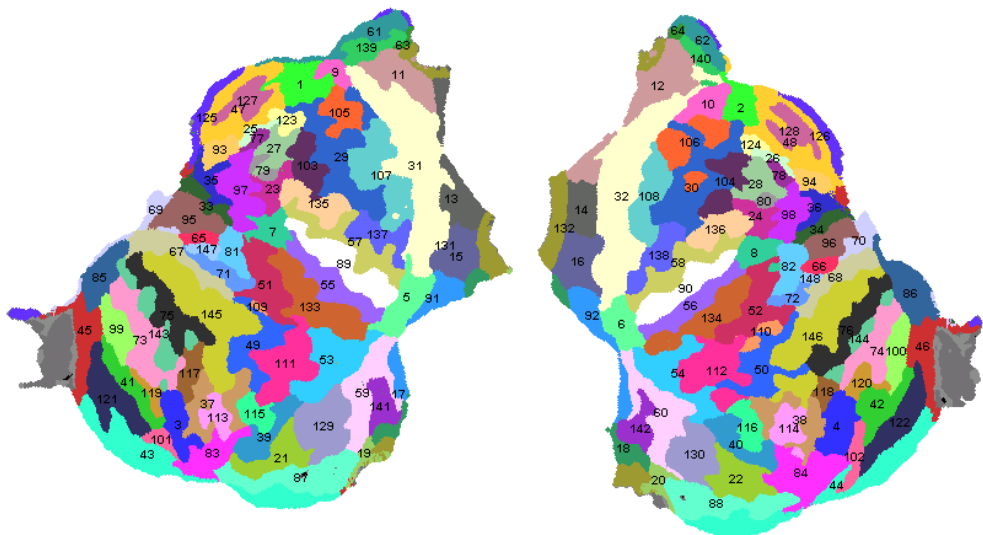

**c**

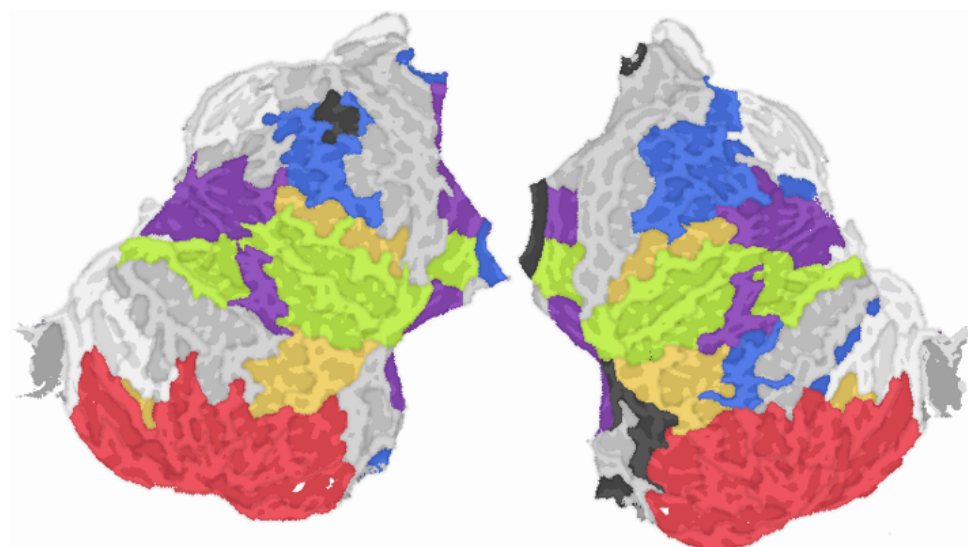

Vis SM DA VA Lim FP DM

Supplement: supp [file elife-13451-supp-v1.zip]
